# Supplementary material
Source: PubMed Central journal article supplement (PMC6159989)
Supplement: jci-128-99481-s051.pdf [file jci-128-99481-s051.pdf]

**Supplemental Table 1: Top 10 GSEA pathways from C2-curated collection for rank-order genes negatively correlated with Par-4 expression.**

| <b>GSEA pathway</b>                                         | <b>p-value</b> | <b>adj. p-value</b> | <b>ES</b> | <b>NES</b> |
|-------------------------------------------------------------|----------------|---------------------|-----------|------------|
| CHARAFE_BREAST_CANCER_LUMINAL_VS_MESENCHYMAL_DN             | 0.0020         | 0.0517              | -0.5312   | -2.8845    |
| REACTOME_EXTRACELLULAR_MATRIX_ORGANIZATION                  | 0.0019         | 0.0517              | -0.5342   | -2.2623    |
| CHARAFE_BREAST_CANCER_BASAL_VS_MESENCHYMAL_DN               | 0.0019         | 0.0517              | -0.5746   | -2.2614    |
| REACTOME_CHONDROITIN_SULFATE_DERMATAN_SULFATE_METABOLISM    | 0.0019         | 0.0517              | -0.5809   | -2.2347    |
| NIKOLSKY_BREAST_CANCER_1Q21_AMPLICON                        | 0.0019         | 0.0517              | -0.6122   | -2.2122    |
| REACTOME_COLLAGEN_FORMATION                                 | 0.0019         | 0.0517              | -0.5489   | -2.1881    |
| REACTOME_GLYCOSAMINOGLYCAN_METABOLISM                       | 0.0019         | 0.0517              | -0.4789   | -2.1758    |
| SCHUETZ_BREAST_CANCER_DUCTAL_INVASIVE_UP                    | 0.0020         | 0.0517              | -0.4159   | -2.1624    |
| REACTOME_TRANSPORT_TO_THE_GOLGI_AND_SUBSEQUENT_MODIFICATION | 0.0019         | 0.0517              | -0.6071   | -2.1379    |
| GU_PDEF_TARGETS_UP                                          | 0.0019         | 0.0517              | -0.4890   | -2.0843    |
