# Supplementary material
Source: PubMed Central journal article supplement (PMC6159989)
Supplement: jci-128-99481-s053.pdf [file jci-128-99481-s053.pdf]

**Supplemental Table 3. Antibodies, primers, sgRNAs, and Taqman probes.**

| <b>Antibodies</b>                   |                                  |                    |                |                            |
|-------------------------------------|----------------------------------|--------------------|----------------|----------------------------|
| <b>Antibody</b>                     | <b>Source</b>                    | <b>Application</b> | <b>Catalog</b> | <b>Dilution</b>            |
| Par-4                               | Cell Signaling                   | WB ; IF            | #2328          | 1:1000 (WB),<br>1:100 (IF) |
| E-cadherin                          | Cell Signaling                   | WB ; IF            | #14472         | 1:1000 ;<br>1:100 (IF)     |
| Vimentin                            | Cell Signaling                   | WB ; IF            | #5741          | 1:1000 ;<br>1:100 (IF)     |
| Snail                               | Cell Signaling                   | WB                 | #3879          | 1:1000                     |
| Cas9                                | Cell Signaling                   | WB                 | #14697         | 1:1000                     |
| IκBα                                | Cell Signaling                   | WB                 | #4814          | 1:1000                     |
| phospho-IκBα Serine 32              | Cell Signaling                   | WB                 | #2859          | 1:1000                     |
| α-tubulin                           | Santa Cruz                       | WB                 | #8035          | 1:2000                     |
| Twist                               | Abcam                            | WB ; ChIP          | #50887         | 1:250 (WB),<br>5 μg (ChIP) |
| GAPDH                               | Sigma                            | WB                 | #8795          | 1:1000                     |
| FLAG                                | Sigma                            | WB                 | #1804          | 1:1000                     |
| RNA pol II                          | Abcam                            | ChIP               | #817           | 5 μg                       |
| H3K9ac                              | Abcam                            | ChIP               | #4441          | 5 μg                       |
| H3K9me2                             | Abcam                            | ChIP               | #1220          | 5 μg                       |
| H3K27me3                            | Abcam                            | ChIP               | #6002          | 5 μg                       |
| H3K4me3                             | Abcam                            | ChIP               | #8580          | 5 μg                       |
| H3K27ac                             | Abcam                            | ChIP               | #4729          | 5 μg                       |
| Mouse IgG isotype control           | Abcam                            | ChIP               | #18392         | 5 μg                       |
| Rabbit IgG isotype control          | Abcam                            | ChIP               | #171870        | 5 μg                       |
| AlexaFluor® 488 (goat anti-rabbit)  | Life Technologies                | IF                 | A11034         | 1:1000                     |
| AlexaFluor® 647 (goat anti-mouse)   | Life Technologies                | IF                 | A21236         | 1:1000                     |
| AlexaFluor® 568 (goat anti-rabbit)  | Life Technologies                | IF                 | A11036         | 1:1000                     |
| AlexaFluor® 488 (goat anti-mouse)   | Life Technologies                | IF                 | A11029         | 1:1000                     |
| AlexaFluor® 680 (goat anti-rabbit)  | Life Technologies                | WB                 | A21076         | 1:5000                     |
| IRDye® 80CW (goat anti-mouse)       | LiCor                            | WB                 | 926-32210      | 1:5000                     |
| <b>Bisulfite Sequencing Primers</b> |                                  |                    |                |                            |
| Par-4 Forward                       | 5'-GTTTATTTGGATAATTTTATTTT-3'    |                    |                |                            |
| Par-4 Reverse                       | 5'-CTACCACCTATATACACAACCTCCCC-3' |                    |                |                            |
| E-Cadherin Forward                  | 5'-GTTAGAGTATAGTTAGGTTAGGA-3'    |                    |                |                            |
| E- Cadherin Reverse                 | 5'-CTACRACACCRAACRCCA-3'         |                    |                |                            |
| <b>ChIP-qPCR primers</b>            |                                  |                    |                |                            |
| Par-4 Forward                       | 5'-CTCCGGCAAGTCACAACCTT-3'       |                    |                |                            |
| Par-4 Reverse                       | 5'-CCCCTTACCTCCGAGAAGTT-3'       |                    |                |                            |
| E-Cadherin Forward                  | 5'-AGACAGGGGTGGAGGAAGTT-3'       |                    |                |                            |

|                                      |                             |
|--------------------------------------|-----------------------------|
| E-Cadherin Reverse                   | 5'-ACCAGTGAGCAGCGCAGAG-3'   |
| <b>Par-4 re-expression sgRNAs</b>    |                             |
| sgPar-4 #1                           | 5'- ATTCTCGCTTCCCGGGCAGG-3' |
| sgPar-4 #2                           | 5'-TAGGCCGGCGAGTTTGCCG-3'   |
| <b>Taqman gene expression probes</b> |                             |
| <b>Name</b>                          | <b>Catalog</b>              |
| Pawr                                 | Mm01228147                  |
| ErbB2/Her2                           | Rn00566561                  |
| Cdh1                                 | Mm01247357                  |
| Vim                                  | Mm01333430                  |
| Snai1                                | Mm00441533                  |
| Twist1                               | Mm00442036                  |
| Bcl2                                 | Mm00477631                  |
| Ccl5                                 | Mm01302427                  |
| Vcam1                                | Mm01320970                  |
| Mmp2                                 | Mm00439489                  |
| Mmp9                                 | Mm00442991                  |
| Mmp13                                | Mm00439491                  |
| Tbp                                  | Mm00446971                  |
| Actb                                 | Mm02619580                  |
